# Supplementary material for: Variation in Antibiotic Treatment Failure Outcome Definitions in Randomised Trials and Observational Studies of Antibiotic Prescribing Strategies: A Systematic Review and Narrative Synthesis
Source: MDPI journal article supplement (doi:10.3390/antibiotics11050627), 2022-05-06
Supplement: s1 [file s1]

# Variation in antibiotic treatment failure outcome definitions in randomised trials and observational studies of antibiotic prescribing strategies: A systematic review and narrative synthesis

## Supplementary material

Table S1. Description of antibiotic treatment failure components used

| Component category  | Component details                                                         | Number of studies |
|---------------------|---------------------------------------------------------------------------|-------------------|
| Prescription change | Change to different antibiotic                                            | 10                |
| Prescription change | Another prescription for the same antibiotic                              | 2                 |
| Prescription change | New prescription for the same or a different antibiotic within 10 days    | 1                 |
| Prescription change | Change to intravenous antibiotic                                          | 3                 |
| Prescription change | Addition of a second antibiotic                                           | 3                 |
| Prescription change | Increase in antibiotic duration to >14 days                               | 2                 |
| Prescription change | Physician initiated change of antibiotic 3-30 days after index antibiotic | 1                 |
| Prescription change | Index antibiotic changed due to new infection/serious adverse event       | 1                 |
| Prescription change | Second antibiotic within 14 days of index antibiotic                      | 1                 |
| Prescription change | Reconsultation & same-day antibiotic within 14 days of index event        | 2                 |
| Prescription change | New prescription 14-30 days from index event                              | 1                 |
| Prescription change | Additional/change in antibiotic within 28 days                            | 1                 |
| Prescription change | Treatment switch & new diagnosis within 7 days                            | 1                 |
| Prescription change | Additional outpatient visit requiring antibiotic within 42 days           | 1                 |
| Prescription change | New antibiotic prescription with 4-28 days                                | 1                 |
| Prescription change | New antibiotic and diagnostic code 14-28 days from index event            | 2                 |
| Prescription change | Change in antibiotics <72 hours after index event                         | 1                 |
| Clinical condition  | Any signs of WHO defined severe pneumonia                                 | 1                 |
| Clinical condition  | Recurrence of fever within 5-14 days                                      | 1                 |
| Clinical condition  | Withdrawal from trial at 48 hours or days 5-14                            | 1                 |
| Clinical condition  | Development of serious adverse events at 48 hours or days 5-14            | 1                 |
| Clinical condition  | Tachypnoea at 48 hours or days 5-14                                       | 1                 |
| Clinical condition  | Persistence of fever at 48 hours or days 5-14                             | 1                 |
| Clinical condition  | Fast breathing                                                            | 2                 |
| Clinical condition  | No clinical improvement/worsening on day 3                                | 1                 |
| Clinical condition  | Increase in respiratory rate between days 2-5                             | 1                 |
| Clinical condition  | Lower chest indrawing                                                     | 3                 |
| Clinical condition  | Clinical relapse during days 3-30                                         | 1                 |
| Clinical condition  | WHO ICMI danger signs                                                     | 4                 |
| Clinical condition  | Death                                                                     | 7                 |
| Clinical condition  | Persistence of symptoms                                                   | 2                 |
| Clinical condition  | Appearance of new symptoms                                                | 1                 |
| Clinical condition  | Fever days 3-4                                                            | 1                 |

|                    |                                                              |    |
|--------------------|--------------------------------------------------------------|----|
| Clinical condition | Increase in erythema (>25%), swelling or tenderness days 3-4 | 1  |
| Clinical condition | No decrease in erythema, swelling or tenderness days 8-10    | 1  |
| Clinical condition | More than minimal erythema, swelling or tenderness           | 1  |
| Clinical condition | New infection within 14 days of index event                  | 1  |
| Escalation of care | Emergency department visit                                   | 10 |
| Escalation of care | Hospital admission                                           | 16 |
| Escalation of care | Specialist referral                                          | 3  |
| Escalation of care | Surgical intervention                                        | 1  |
